# Supplementary material for: TM atoms on B/N doped defective graphene as a catalyst for oxygen reduction reaction: a theoretical study
Source: Royal Society of Chemistry journal article supplement (doi:10.1039/c5ra15315h), 2015-01-01
Supplement: c5ra15315h1.pdf [file c5ra15315h1.pdf]

## Supplementary Information

### TM atoms on the B/N doped defective graphene as catalyst for oxygen reduction reaction: a theoretical study

Xiaoming Zhang,<sup>1</sup> Shansheng Yu<sup>1\*</sup>, Hong Chen<sup>2</sup>, Weitao Zheng<sup>1\*</sup>

<sup>1</sup>Department of Materials Science, Key Laboratory of Mobile Materials, MOE, and State Key Laboratory of Superhard Materials, Jilin University, Changchun 130012, PR China.

<sup>2</sup> Department of Control Science & Engineering, Jilin University, Changchun 130012, PR China.

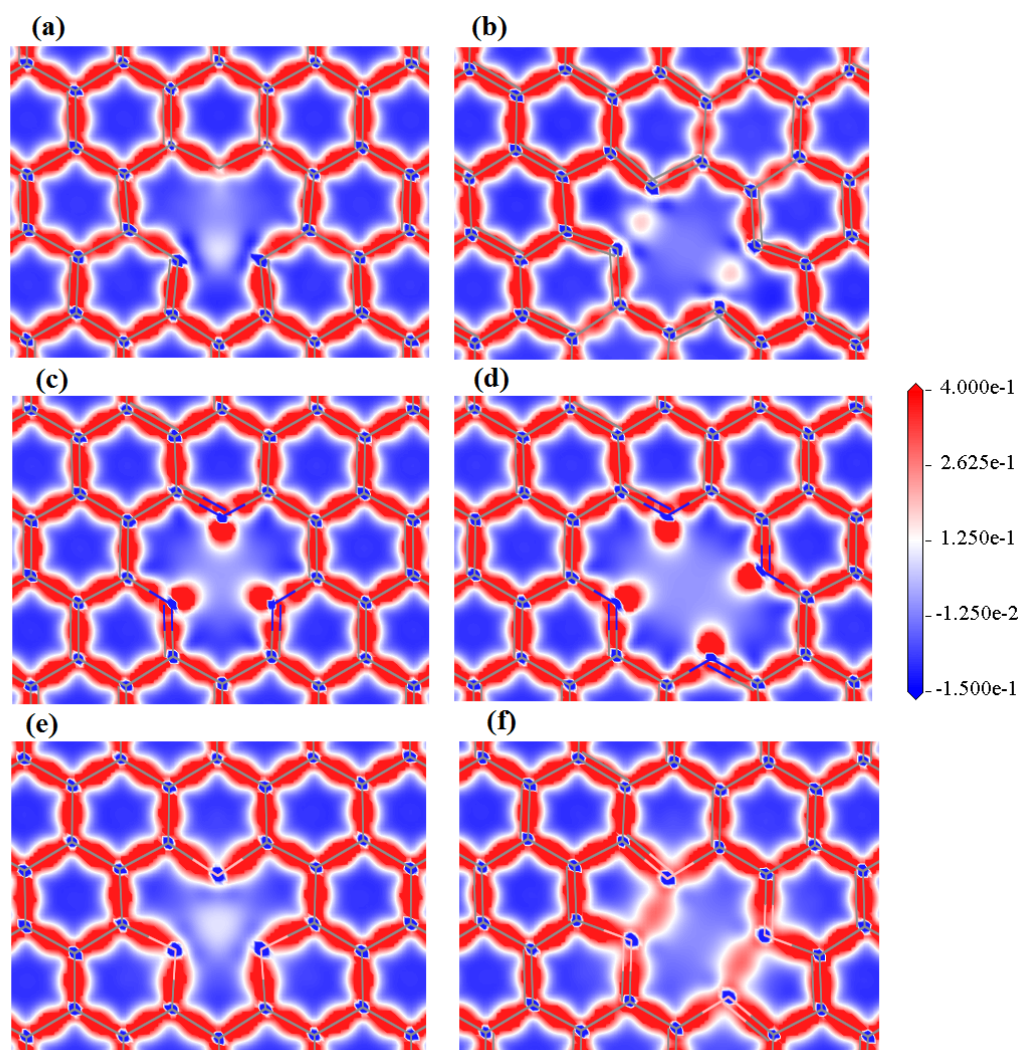

**Fig S 1** Deformation electron density for six V1, (a); V2, (b); VN1, (c); VN2, (d); VB1, (e) and VB2 (f). The red color represents electron accumulation, while the blue color represents electron depletion. The intensity of color depends on the amount of electron change: the darkest red marks the most accumulation; the darkest blue marks the most depletion. (For interpretation of the references to color in this figure legend, the reader is referred to the web version of this article.)

**Table S 1** The formation energy, bond length, hirshfeld charge and hirshfeld spin of dangling atoms.

|     | $E_{form}$    | $l1$ | Charge      | Spin       |
|-----|---------------|------|-------------|------------|
| V1  | 7.63, 7.85[1] | 2.10 | 0.01, -0.01 | 0.07, 0.67 |
| VN1 | 3.51, 3.53[1] | 2.61 | -0.11       | 0.00       |
| VB1 | 4.16          | 2.18 | 0.09        | 0.00       |
| V2  | 7.84, 8.51[1] | 1.80 | 0.01        | 0.00       |
| VN2 | 4.00, 3.99[1] | 2.62 | -0.11       | 0.00       |
| VB2 | 6.59          | 1.85 | 0.07        | 0.00       |

**Table S 2** Hirshfeld charge of TM-vacancy complex

| TM | V1   |       | VN1  |       | VB1  |       | V2   |       | VN2  |       | VB2  |       |
|----|------|-------|------|-------|------|-------|------|-------|------|-------|------|-------|
|    | TM   | C1    | TM   | N1    | TM   | B1    | TM   | C1    | TM   | N1    | TM   | B1    |
| Sc | 0.61 | -0.14 | 0.71 | -0.15 | 0.67 | -0.02 | 0.57 | -0.12 | 0.67 | -0.15 | 0.68 | -0.02 |
| Ti | 0.51 | -0.13 | 0.55 | -0.13 | 0.51 | 0.00  | 0.55 | -0.12 | 0.44 | -0.13 | 0.49 | -0.00 |
| V  | 0.47 | -0.11 | 0.40 | -0.11 | 0.40 | 0.01  | 0.42 | -0.10 | 0.34 | -0.13 | 0.42 | 0.00  |
| Cr | 0.54 | -0.12 | 0.50 | -0.13 | 0.45 | 0.01  | 0.51 | -0.11 | 0.44 | -0.15 | 0.51 | -0.01 |
| Mn | 0.32 | -0.08 | 0.28 | -0.09 | 0.32 | 0.01  | 0.28 | -0.08 | 0.27 | -0.11 | 0.28 | 0.02  |
| Fe | 0.26 | -0.06 | 0.27 | -0.08 | 0.29 | 0.02  | 0.21 | -0.07 | 0.20 | -0.10 | 0.20 | 0.04  |
| Co | 0.21 | -0.05 | 0.19 | -0.09 | 0.18 | 0.03  | 0.13 | -0.06 | 0.18 | -0.09 | 0.17 | 0.05  |
| Ni | 0.23 | -0.04 | 0.24 | -0.09 | 0.20 | 0.05  | 0.05 | -0.05 | 0.09 | -0.08 | 0.08 | 0.06  |
| Cu | 0.38 | -0.09 | 0.31 | -0.13 | 0.34 | 0.01  | 0.39 | -0.10 | 0.37 | -0.13 | 0.33 | 0.02  |
| Zn | 0.34 | -0.10 | 0.37 | -0.13 | 0.31 | 0.04  | 0.36 | -0.08 | 0.41 | -0.13 | 0.40 | 0.01  |
| Pd | 0.56 | -0.08 | 0.38 | -0.13 | 0.45 | 0.01  | 0.46 | -0.10 | 0.47 | -0.14 | 0.46 | 0.02  |
| Pt | 0.42 | -0.05 | 0.22 | -0.11 | 0.32 | 0.04  | 0.29 | -0.07 | 0.28 | -0.11 | 0.31 | 0.05  |

**Table S 3** The binding energy, deformation energy and interaction energy of various TM-vacancy complexes.

TM-monovacancy complexes

| TM | TM-V1 |             |             | TM-VN1 |             |             | TM-VB1 |             |             |
|----|-------|-------------|-------------|--------|-------------|-------------|--------|-------------|-------------|
|    | $E_b$ | $E_{defor}$ | $E_{inter}$ | $E_b$  | $E_{defor}$ | $E_{inter}$ | $E_b$  | $E_{defor}$ | $E_{inter}$ |
| Sc | -7.04 | 1.03        | -8.07       | -6.37  | 0.74        | -7.11       | -3.38  | 0.05        | -3.43       |
| Ti | -8.27 | 0.84        | -9.11       | -6.29  | 0.80        | -7.09       | -3.24  | 0.04        | -3.28       |
| V  | -7.41 | 0.86        | -8.27       | -5.73  | 0.63        | -6.36       | -2.50  | 0.18        | -2.67       |
| Cr | -6.28 | 0.86        | -7.14       | -3.97  | 0.77        | -4.74       | -1.85  | 0.01        | -1.87       |
| Mn | -6.44 | 0.74        | -7.18       | -4.24  | 0.63        | -4.87       | -2.12  | 0.84        | -2.96       |
| Fe | -7.73 | 0.89        | -8.62       | -5.38  | 0.52        | -5.90       | -3.31  | 0.98        | -4.29       |
| Co | -8.14 | 0.68        | -8.82       | -5.21  | 0.54        | -5.75       | -3.95  | 1.14        | -5.09       |
| Ni | -6.76 | 0.54        | -7.30       | -4.49  | 0.56        | -5.05       | -3.94  | 1.13        | -5.07       |
| Cu | -3.54 | 0.86        | -4.40       | -3.00  | 0.48        | -3.48       | -2.24  | 0.05        | -2.30       |
| Zn | -1.40 | 1.80        | -3.20       | -1.58  | 0.53        | -2.11       | -0.62  | 0.02        | -0.64       |

|           |       |      |       |       |      |       |       |      |       |
|-----------|-------|------|-------|-------|------|-------|-------|------|-------|
| <b>Pd</b> | -4.25 | 0.66 | -4.91 | -1.70 | 0.14 | -1.84 | -2.48 | 1.49 | -3.96 |
| <b>Pt</b> | -3.95 | 0.80 | -4.75 | -1.25 | 0.13 | -1.38 | -2.28 | 1.82 | -4.10 |

TM-divacancy complexes

| TM        | TM-V1 |             |             | TM-VN2 |             |             | TM-VB1 |             |             |
|-----------|-------|-------------|-------------|--------|-------------|-------------|--------|-------------|-------------|
|           | $E_b$ | $E_{defor}$ | $E_{inter}$ | $E_b$  | $E_{defor}$ | $E_{inter}$ | $E_b$  | $E_{defor}$ | $E_{inter}$ |
| <b>Sc</b> | -6.04 | 2.88        | -8.92       | -8.56  | 0.62        | -9.18       | -5.39  | 0.32        | -5.70       |
| <b>Ti</b> | -7.50 | 2.63        | -10.13      | -8.34  | 0.56        | -8.90       | -5.37  | 0.31        | -5.67       |
| <b>V</b>  | -6.69 | 2.35        | -9.05       | -7.63  | 0.68        | -8.31       | -4.69  | 0.36        | -5.04       |
| <b>Cr</b> | -5.19 | 2.61        | -7.80       | -6.66  | 0.53        | -7.19       | -3.22  | 0.54        | -3.76       |
| <b>Mn</b> | -5.43 | 2.69        | -8.12       | -6.76  | 0.61        | -7.37       | -3.46  | 0.50        | -3.96       |
| <b>Fe</b> | -6.12 | 2.54        | -8.67       | -7.90  | 0.58        | -8.48       | -4.77  | 0.74        | -5.52       |
| <b>Co</b> | -6.62 | 2.72        | -9.34       | -8.31  | 0.53        | -8.83       | -5.19  | 0.74        | -5.92       |
| <b>Ni</b> | -6.27 | 3.08        | -9.35       | -7.68  | 0.56        | -8.24       | -4.93  | 1.01        | -5.94       |
| <b>Cu</b> | -4.86 | 2.96        | -7.82       | -4.93  | 0.43        | -5.35       | -3.46  | 1.02        | -4.48       |
| <b>Zn</b> | -2.52 | 2.85        | -5.37       | -3.60  | 0.48        | -4.08       | -1.12  | 0.57        | -1.69       |
| <b>Pd</b> | -3.23 | 2.77        | -6.00       | -4.31  | 0.67        | -4.98       | -3.18  | 1.81        | -4.99       |
| <b>Pt</b> | -2.92 | 3.32        | -6.24       | -3.65  | 0.90        | -4.55       | -3.02  | 2.15        | -5.17       |

**Table S 4** The TM-C(B/N) bond length change after  $O_2$ , OOH, HOOH and OH adsorbed on V1 and VN2 complexes.

| TM        | TM-VN2     |                   |                   |                   |                   |                   |
|-----------|------------|-------------------|-------------------|-------------------|-------------------|-------------------|
|           | $l_{TM-N}$ | $\nabla l_{TM-N}$ |
|           | bare       | $O_2$             | OOH               | HOOH              | OH                | O                 |
| <b>Sc</b> | 2.10       | 0.09*2            | 0.06*2            | 0.20*2            | 0.06*4            | 0.02*4            |
|           |            | 0.08*2            | 0.08*2            | 0.25*2            |                   |                   |
| <b>Ti</b> | 2.05       | 0.03*2            | 0.01*3            | 0.07*2            | 0.02*4            | 0.04*4            |
|           |            | 0.06*2            | 0.05              | 0.11*2            |                   |                   |
| <b>V</b>  | 2.00       | 0.03*2            | 0.03*3            | 0.07*2            | 0.01*2            | 0.05*4            |
|           |            | 0.06*2            | 0.08              | 0.13*2            | 0.03*2            |                   |
| <b>Cr</b> | 1.95       | 0.05*2            | 0.03*2            | 0.08              | 0.03*4            | 0.06*4            |
|           |            | 0.06*2            | 0.04*2            | 0.10              |                   |                   |
|           |            |                   |                   | 0.17*2            |                   |                   |
| <b>Mn</b> | 1.93       | 0.06*2            | 0.02*2            | 0.18*2            | 0.03*2            | 0.04*4            |
|           |            | 0.08*2            | 0.05*2            | 0.10              | 0.04*2            |                   |
|           |            |                   |                   | 0.11              |                   |                   |
| <b>Fe</b> | 1.91       | 0.01              | 0.01              | 0.09*2            | 0.01*2            | 0.03*4            |
|           |            | 0.02*3            | 0.02*3            | 0.17              | 0.02*2            |                   |
|           |            |                   |                   | 0.19              |                   |                   |
| <b>Co</b> | 1.91       | 0.01*4            | 0.01*4            | 0.01*4            | 0.00*2            | 0.02*4            |
|           |            |                   |                   |                   | 0.01*2            |                   |
| <b>Ni</b> | 1.89       | 0.00*4            | 0.02*4            | -0.00*4           | 0.02              | 0.02*2            |
|           |            |                   |                   |                   | 0.03*3            | -0.02             |
|           |            |                   |                   |                   |                   | 0.00              |
| <b>Cu</b> | 1.94       | 0.00*4            | 0.04*4            | 0.01              | 0.10*3            | 0.02*2            |

|    |      |         |         |         |        |        |
|----|------|---------|---------|---------|--------|--------|
|    |      |         |         | 0.00*3  | 0.11   | -0.03  |
|    |      |         |         |         |        | 0.00   |
| Zn | 1.97 | 0.07*2  | 0.12*3  | 0.31*2  | 0.16*3 | 0.02*2 |
|    |      | 0.08*2  | 0.33    | 0.31*2  | 0.17   | 0.04   |
|    |      |         |         |         |        | -0.04  |
| Pd | 1.99 | -0.01*4 | -0.01*4 | -0.01*2 | -0.01  | 0.01*2 |
|    |      |         |         | 0.02*2  | -0.00  | 0.00   |
|    |      |         |         |         | 0.01*2 | -0.02  |
| Pt | 2.01 | -0.00*4 | 0.01*4  | -0.00*4 | 0.01*2 | 0.03   |
|    |      |         |         |         | 0.02   | 0.02   |
|    |      |         |         |         | 0.03   | 0.00*2 |

**Table S 5** The adsorption energies,  $E_{\text{ads}}$ , of reactants and intermediate products of oxygen reduction reaction on the V1 and VN2 graphene surfaces.

TM-VN2

|    | $E_{\text{ads}}(\text{O}_2)$ | $E_{\text{ads}}(\text{OOH})$ | $E_{\text{ads}}(\text{HOOH})$ | $E_{\text{ads}}(\text{O})$ | $E_{\text{ads}}(\text{OH})$ |
|----|------------------------------|------------------------------|-------------------------------|----------------------------|-----------------------------|
| Sc | -2.87                        | -3.76                        | -5.20                         | -5.22                      | -5.10                       |
| Ti | -4.34                        | -4.00                        | -6.28                         | -7.55                      | -5.35                       |
| V  | -3.42                        | -3.29                        | -5.08                         | -7.33                      | -4.61                       |
| Cr | -1.99                        | -2.21                        | -3.56                         | -6.06                      | -3.54                       |
| Mn | -1.46                        | -1.97                        | -2.71                         | -5.01                      | -3.23                       |
| Fe | -1.02                        | -1.88                        | -2.03                         | -4.20                      | -2.95                       |
| Co | -0.80                        | -1.54                        | -1.55                         | -2.92                      | -2.62                       |
| Ni | -0.16                        | -0.50                        | -0.50                         | -2.39                      | -1.46                       |
| Cu | -0.25                        | -0.58                        | -0.50                         | -2.47                      | -1.58                       |
| Zn | -0.45                        | -1.30                        | -1.32                         | -2.45                      | -2.57                       |
| Pd | -0.04                        | -0.14                        | 0.11                          | -2.37                      | -1.39                       |
| Pt | 0.09                         | 1.67                         | -0.19                         | -2.31                      | -1.38                       |

[1] S. Kattel, P. Atanassov, B. Kiefer, The Journal of Physical Chemistry C 116 (2012) 8161-8166.
